# Supplementary material for: Three new polymorphs of 1,8-diacetylpyrene: a material with packing-dependent luminescence properties and a testbed for crystal structure prediction
Source: Royal Society of Chemistry journal article supplement (doi:10.1039/d0tc05522k), 2021-01-01
Supplement: d0tc05522k1.pdf [file d0tc05522k1.pdf]

Three new polymorphs of 1,8-diacetylpirene:  
a material with packing-dependent  
luminescence properties and a testbed  
for Crystal Structure Prediction  
Supporting Information

Daniel Tchoń, David Bowskill, Isaac Sugden,  
Piotr Piotrowski and Anna Makal,  
contact: *amakal@chem.uw.edu.pl*

December 22, 2020

# Contents

|                                                                                                              |            |
|--------------------------------------------------------------------------------------------------------------|------------|
| <b>S1 Methods</b>                                                                                            | <b>S2</b>  |
| S1.1 Crystallizations . . . . .                                                                              | S2         |
| S1.2 Melting point determination . . . . .                                                                   | S2         |
| S1.3 High-pressure experiments . . . . .                                                                     | S3         |
| S1.4 X-ray data collection . . . . .                                                                         | S3         |
| S1.5 Deposition . . . . .                                                                                    | S6         |
| S1.6 Photographs . . . . .                                                                                   | S6         |
| S1.7 Crystal Structure Prediction . . . . .                                                                  | S6         |
| S1.8 Other Theoretical Calculations . . . . .                                                                | S8         |
| <b>S2 Structure description</b>                                                                              | <b>S10</b> |
| S2.1 Phase transitions of 2"AP- $\alpha$ . . . . .                                                           | S10        |
| S2.2 Comparison of 2"AP- $\alpha$ , 2"AP- $\beta$ with optimized free molecule . . . . .                     | S11        |
| <b>S3 Lattice interactions</b>                                                                               | <b>S12</b> |
| S3.1 The most important intermolecular interactions . . . . .                                                | S12        |
| <b>S4 Distinct spectroscopic properties of 2"AP polymorphs</b>                                               | <b>S14</b> |
| S4.1 Luminescence of 2"AP in the solid state . . . . .                                                       | S14        |
| S4.2 Fluorescence decay curves . . . . .                                                                     | S15        |
| S4.3 Solid-state Raman spectra - a detailed band assignment . . . . .                                        | S16        |
| S4.4 Fluorescence as a function of pressure . . . . .                                                        | S16        |
| S4.5 Comments on the former works regarding spectroscopic properties of<br>2"AP in the solid state . . . . . | S17        |
| <b>S5 Theoretical calculations</b>                                                                           | <b>S18</b> |
| S5.1 Conformational landscape of 2"AP . . . . .                                                              | S18        |
| S5.2 Electronic excitations in 2"AP . . . . .                                                                | S22        |
| S5.3 Band gaps . . . . .                                                                                     | S24        |
| <b>S6 Bibliography</b>                                                                                       | <b>S26</b> |

# Chapter S1

## Methods

### S1.1 Crystallizations

Crystallization solutions were prepared at room temperature by placing  $\approx 5$  mg of 2"AP in 2 mL glass vials, adding 100  $\mu\text{L}$  of solvent and vortexing at 3000 rpm for a few seconds. In case of a lack of solubility, another 100  $\mu\text{L}$  of solvent was added and vortexing was repeated. Final solutions contained 1 mL of acetonitrile, 1.5 mL of methanol, 100  $\mu\text{L}$  of chloroform and 100  $\mu\text{L}$  of anisole accordingly. Additionally, two  $\approx 2$  mg samples of 2"AP were placed in separate 2 mL glass vials, dissolved in 0.5 mL of acetonitrile and 0.75 mL of methanol accordingly and 200  $\mu\text{L}$  of n-hexane was placed on top of these solution. The samples were left for the solvent to evaporate.

Crystallizations from anisole, acetonitrile / n-hexane and chloroform / n-hexane mixtures yielded selectively  $\alpha$  form. Crystallizations from acetonitrile alone or anisole / n-hexane mixture yielded predominantly 2"AP- $\alpha$  with traces of  $\beta$  in the form of extremely thin tiny plates. Crystallizations from chloroform and methanol with or without n-hexane yielded selectively 2"AP- $\beta$  as thick dark-yellow plates.

Crystals of 2"AP- $\gamma$  and 2"AP- $\delta$  polymorphs could be obtained exclusively by pressurization of the 2"AP- $\alpha$  in quasi-hydrostatic conditions in a Diamond Anvil Cell, yielding single-crystal to single-crystal transformation. In both instances phase transitions were fully reversible and a single crystal of 2"AP- $\alpha$  could be retrieved once atmospheric pressure was restored. 2"AP- $\gamma$  could only be obtained with very rapid pressure increase, i.e.: from atmospheric to  $\approx 1$  GPa in a single step (i.e. in less than 30 s) and hence was more difficult to obtain, especially in a DAC where pressure was increased by manual tightening the screws. More gradual pressurization of 2"AP- $\alpha$  led consistently to 2"AP- $\delta$  polymorph. Obtaining of either 2"AP- $\gamma$  or 2"AP- $\delta$  did not depend on a pressure-transmitting media used in our experiments (either Paratone-N or silicone oil).

### S1.2 Melting point determination

Determination of the melting point temperatures was performed for single crystals of the polymorphs of 2"AP available at atmospheric pressure. The purity and quality of each crystal was confirmed by a short X-ray diffraction experiment (unit cell determination). Similarly-sized single crystals were placed on a siliconized glass wafer

on a LinkamScientific TMS94 hot stage and then slowly heated at a rate of 2°C/min in air under a microscope. Such procedure was repeated twice on fresh single crystals. The 2"AP- $\beta$  consistently melted first at ca. 157°C, while melting of 2"AP- $\alpha$  occurred at ca. 162°C, in agreement with earlier studies [Rajagopal et al., 2014].

### S1.3 High-pressure experiments

High-pressure experiments utilized multiple Diamond Anvil Cells (DACs) of either modified Merrill & Bassett [Merrill and Bassett, 1974] or DACOne20 design, the latter used mainly in the case of 2"AP- $\beta$  diffraction studies. The main difference between these two designs is the aperture angle, which in the second case is significantly larger. DACs utilized in spectroscopic experiments were also tested for inherent diamond fluorescence to assure that it would not affect sample measurements. The tests in all cases revealed insignificant response to excitation beam.

Pressure estimation utilized fluorescence from reference ruby spheres, one of which was inserted into DAC alongside the sample in each high pressure experiment. The ruby signal was identified using an Almax Optiprex PLS spectrometer, affording the nominal precision of 0.05 GPa. Position of the R1 peak was determined by the means of fitting a pseudo-Voigt curve to the fluorescence spectrum using custom-made software pRuby. [Tchoń and Makal, 2021]. The pressure was then estimated based on calibration curve determined by Piermarini et al. [Piermarini et al., 1975]. Temperature correction was also applied. [Ragan et al., 1992] The R1 shift was in each case estimated relative to a reference point, which was measured using the same ruby inside DAC at the beginning or at the end of respective study.

**Table S1.1:** Parameters of DACs utilized in performed high pressure experiments.

|                            | Modified Merrill-Bassett | DAC One20 |
|----------------------------|--------------------------|-----------|
| Diameter of diamond cullet | 0.75 mm                  | 0.50 mm   |
| Diameter of gasket hole    | 0.50 mm                  | 0.30 mm   |
| Nominal opening angle      | 40°                      | 60°       |
| Effective opening angle    | 30–35°                   | 45–50°    |

Effective DAC opening angle cutoffs, smaller than the nominal aperture were used for the sake of data processing, as the intensities of the few reflections registered beyond the effective limits were found to be heavily affected by gasket shadowing.

### S1.4 X-ray data collection

XRD data collection was performed using CrysAlisPRO version 1.171.38.46, according to the description provided in the main text. Since high data completeness could not be obtained in some high-pressure cases, experimental strategies involved exposition times up to 400 seconds per frame and multiple redundant runs to assure that collected data will be of best possible quality. A summary of obtained unit cell parameters and other experiment descriptors are listed in Tables S1.2 and S1.3.

**Table S1.2:** Data reduction and refinement details for 2"AP- $\alpha$ ,  $\gamma$  and  $\delta$ .

|                                         |                                       |           |            |           |            |            |           |            |
|-----------------------------------------|---------------------------------------|-----------|------------|-----------|------------|------------|-----------|------------|
| <b>Crystal data</b>                     |                                       |           |            |           |            |            |           |            |
| Sum formula, $M_r$                      | $C_{20}H_{14}O_2$ , 286.31            |           |            |           |            |            |           |            |
| Symmetry information                    | monoclinic, $P2_1/c$ , $Z=4$ , $Z'=1$ |           |            |           |            |            |           |            |
| Crystal phase                           | $\alpha$                              | $\alpha$  | $\gamma$   | $\gamma$  | $\gamma$   | $\delta$   | $\delta$  | $\delta$   |
| Pressure \ GPa                          | 0.00                                  | 0.34(10)  | 0.84(10)   | 1.16(1)   | 1.65(10)   | 0.88(10)   | 0.98(10)  | 2.12(10)   |
| $a$ \ $\text{\AA}$                      | 8.13770(10)                           | 8.109(3)  | 8.072(3)   | 7.997(3)  | 8.045(4)   | 8.288(2)   | 8.250(2)  | 8.2093(19) |
| $b$ \ $\text{\AA}$                      | 22.9058(3)                            | 22.807(5) | 22.714(12) | 22.591(8) | 22.756(10) | 21.531(9)  | 21.62(10) | 21.333(7)  |
| $c$ \ $\text{\AA}$                      | 7.23590(10)                           | 7.27(2)   | 7.106(11)  | 6.94(3)   | 6.80(4)    | 7.213(9)   | 7.166(2)  | 6.973(8)   |
| $\beta$ \ $^\circ$                      | 93.7010(10)                           | 93.12(11) | 92.98(7)   | 92.73(14) | 93.1(2)    | 98.93(5)   | 98.87(3)  | 99.07(5)   |
| $V$ \ $\text{\AA}^3$                    | 1345.96(3)                            | 1343(4)   | 1301(2)    | 1253(6)   | 1243(8)    | 1271.6(17) | 1263(6)   | 1205.8(15) |
| Density \ $\text{g cm}^{-3}$            | 1.413                                 | 1.416     | 1.462      | 1.518     | 1.531      | 1.496      | 1.506     | 1.577      |
| <b>Data collection</b>                  |                                       |           |            |           |            |            |           |            |
| Temperature                             | 100.00(10)                            | 295       | 293(2)     | 293(2)    | 293(2)     | 296.1(7)   | 293(2)    | 296.2(4)   |
| Radiation type                          | micro-focus sealed X-ray tube         |           |            |           |            |            |           |            |
| Wavelength \ $\text{\AA}$               | 0.71073                               | 0.56087   | 0.56087    | 0.56087   | 0.56087    | 0.56087    | 0.56087   | 0.56087    |
| Absorption correction                   | Empirical multi-scan (SCALE3 ABSPACK) |           |            |           |            |            |           |            |
| $\mu$ \ $\text{mm}^{-1}$                | 0.090                                 | 0.058     | 0.060      | 0.062     | 0.062      | 0.061      | 0.061     | 0.064      |
| Tmin                                    | 0.61121                               | 0.27698   | 0.06509    | 0.00708   | 0.07587    | 0.15978    | 0.82644   | 0.81465    |
| Tmax                                    | 1.00000                               | 1.00000   | 1.00000    | 1.00000   | 1.00000    | 1.00000    | 1.00000   | 1.00000    |
| Diffractometer                          | Rigaku Oxford Diffraction SuperNova   |           |            |           |            |            |           |            |
| Resolution \ $\text{\AA}$               | 0.442                                 | 0.780     | 0.904      | 0.781     | 0.837      | 0.830      | 0.801     | 0.830      |
| Reflections: measured                   | 115754                                | 4077      | 861        | 1454      | 1451       | 5304       | 2063      | 4747       |
| independent                             | 16246                                 | 821       | 533        | 607       | 528        | 1188       | 579       | 1064       |
| observed                                | 13010                                 | 611       | 271        | 380       | 308        | 514        | 350       | 536        |
| h range                                 | [-18, 18]                             | [-10, 10] | [-8, 8]    | [-10, 10] | [-9, 9]    | [-9, 9]    | [-10, 9]  | [-9, 9]    |
| k range                                 | [-51, 51]                             | [-28, 29] | [-23, 12]  | [-20, 25] | [-22, 24]  | [-24, 24]  | [-5, 5]   | [-24, 24]  |
| l range                                 | [-14, 16]                             | [-3, 4]   | [-4, 3]    | [-3, 3]   | [-3, 3]    | [-5, 5]    | [-8, 8]   | [-5, 5]    |
| Rint                                    | 0.0459                                | 0.0605    | 0.0906     | 0.0396    | 0.0846     | 0.2050     | 0.0741    | 0.1138     |
| Rsigma                                  | 0.0277                                | 0.0636    | 0.1451     | 0.0633    | 0.1040     | 0.2061     | 0.1067    | 0.1515     |
| Completeness to 0.83 $\text{\AA}$       | 100.0%                                | 29.7%     | 22.5%      | 24.6%     | 23.4%      | 51.3%      | 24.3%     | 48.3%      |
| <b>Refinement</b>                       |                                       |           |            |           |            |            |           |            |
| R1                                      | 0.0752                                | 0.1399    | 0.2024     | 0.1441    | 0.2230     | 0.2165     | 0.1413    | 0.1819     |
| R1 ( $I > 2\sigma$ )                    | 0.0590                                | 0.0971    | 0.1208     | 0.0975    | 0.1558     | 0.0958     | 0.0659    | 0.0794     |
| wR2                                     | 0.1535                                | 0.2272    | 0.3526     | 0.2964    | 0.3986     | 0.2589     | 0.1409    | 0.1974     |
| wR2 ( $I > 2\sigma$ )                   | 0.1452                                | 0.2045    | 0.2866     | 0.2547    | 0.3561     | 0.1922     | 0.1149    | 0.1542     |
| GooF (restrained)                       | 1.136                                 | 1.064     | 0.908      | 0.966     | 1.050      | 1.050      | 1.000     | 1.045      |
| No. of parameters                       | 201                                   | 177       | 201        | 175       | 175        | 201        | 201       | 201        |
| No. of restraints                       | 0                                     | 165       | 291        | 208       | 353        | 0          | 189       | 6          |
| $\Delta\rho_{max}$ \ $e\text{\AA}^{-3}$ | 1.679                                 | 0.159     | 0.318      | 0.271     | 0.432      | 0.251      | 0.089     | 0.189      |
| $\Delta\rho_{min}$ \ $e\text{\AA}^{-3}$ | -0.335                                | -0.128    | -0.277     | -0.211    | -0.400     | -0.238     | -0.098    | -0.200     |
| $\Delta\rho_{rms}$ \ $e\text{\AA}^{-3}$ | 0.079                                 | 0.034     | 0.073      | 0.059     | 0.120      | 0.064      | 0.025     | 0.048      |

**Table S1.3:** Data reduction and refinement details for 2"AP- $\beta$ .

| <b>Crystal data</b>                     |                                         |            |            |            |            |           |            |           |         |
|-----------------------------------------|-----------------------------------------|------------|------------|------------|------------|-----------|------------|-----------|---------|
| Sum formula, $M_r$                      | $C_{20}H_{14}O_2$ , 286.31              |            |            |            |            |           |            |           |         |
| Symmetry information                    | orthorhombic, $Fdd2$ , $Z=8$ , $Z'=0.5$ |            |            |            |            |           |            |           |         |
| Crystal phase                           | $\beta$                                 | $\beta$    | $\beta$    | $\beta$    | $\beta$    | $\beta$   | $\beta$    | $\beta$   | $\beta$ |
| Pressure \ GPa                          | 0.00                                    | 0.72(10)   | 1.00(10)   | 1.29(1)    | 1.57(10)   | 1.64(10)  | 1.87(10)   | 2.03(10)  |         |
| $a$ \ $\text{\AA}$                      | 4.69175(9)                              | 4.5651(17) | 4.5674(17) | 4.5691(17) | 4.5836(11) | 4.464(8)  | 4.5345(14) | 4.545(3)  |         |
| $b$ \ $\text{\AA}$                      | 35.5546(5)                              | 35.55(9)   | 35.23(9)   | 34.74(9)   | 34.10(6)   | 34.87(11) | 34.26(7)   | 34.45(15) |         |
| $c$ \ $\text{\AA}$                      | 16.2326(3)                              | 16.071(5)  | 16.111(6)  | 15.984(5)  | 16.062(4)  | 15.923(7) | 16.040(5)  | 16.010(8) |         |
| $V$ \ $\text{\AA}^3$                    | 2707.81(8)                              | 2608(7)    | 2592(7)    | 2537(7)    | 2511(4)    | 2479(9)   | 2492(6)    | 2506(11)  |         |
| Density \ $\text{g cm}^{-3}$            | 1.405                                   | 1.458      | 1.467      | 1.499      | 1.515      | 1.534     | 1.527      | 1.518     |         |
| <b>Data collection</b>                  |                                         |            |            |            |            |           |            |           |         |
| Temperature                             | 100.00(10)                              | 284(11)    | 290.6(10)  | 291.3(3)   | 291.3(3)   | 293(2)    | 293(2)     | 291.2(4)  |         |
| Radiation type                          | micro-focus sealed X-ray tube           |            |            |            |            |           |            |           |         |
| Wavelength \ $\text{\AA}$               | 0.71073                                 | 0.71073    | 0.71073    | 0.71073    | 0.71073    | 0.56087   | 0.71073    | 0.71073   |         |
| Absorption correction                   | Empirical multi-scan (SCALE3 ABSPACK)   |            |            |            |            |           |            |           |         |
| $\mu$ \ $\text{mm}^{-1}$                | 0.090                                   | 0.093      | 0.094      | 0.096      | 0.097      | 0.063     | 0.098      | 0.097     |         |
| Tmin                                    | 0.827                                   | 0.79464    | 0.65734    | 0.80931    | 0.79559    | 0.78945   | 0.37716    | 0.56306   |         |
| Tmax                                    | 1.00000                                 | 1.00000    | 1.00000    | 1.00000    | 1.00000    | 1.00000   | 1.00000    | 1.00000   |         |
| Diffractometer                          | Rigaku Oxford Diffraction SuperNova     |            |            |            |            |           |            |           |         |
| Resolution \ $\text{\AA}$               | 0.476                                   | 0.831      | 0.727      | 0.822      | 0.729      | 0.902     | 0.860      | 0.925     |         |
| Reflections: measured                   | 31142                                   | 2321       | 2279       | 1540       | 2015       | 713       | 2008       | 1248      |         |
| independent                             | 6521                                    | 631        | 683        | 552        | 659        | 366       | 500        | 381       |         |
| observed                                | 4903                                    | 293        | 471        | 244        | 454        | 222       | 327        | 214       |         |
| h range                                 | [-8, 9]                                 | [-5, 5]    | [-6, 5]    | [-5, 5]    | [-6, 5]    | [-4, 4]   | [-5, 5]    | [-4, 4]   |         |
| k range                                 | [-69, 74]                               | [-18, 19]  | [-18, 18]  | [-17, 17]  | [-17, 18]  | [-22, 29] | [-18, 18]  | [-16, 15] |         |
| l range                                 | [-33, 33]                               | [-19, 19]  | [-21, 21]  | [-19, 19]  | [-21, 21]  | [-17, 17] | [-18, 18]  | [-16, 16] |         |
| Rint                                    | 0.0490                                  | 0.1286     | 0.0726     | 0.1272     | 0.0528     | 0.0775    | 0.1406     | 0.1851    |         |
| Rsigma                                  | 0.0449                                  | 0.1141     | 0.0675     | 0.1364     | 0.0620     | 0.1278    | 0.1308     | 0.1144    |         |
| Completeness to 0.83 $\text{\AA}$       | 99.5%                                   | 53.5%      | 52.3%      | 49.5%      | 51.4%      | 39.8%     | 47.4%      | 34.5%     |         |
| <b>Refinement</b>                       |                                         |            |            |            |            |           |            |           |         |
| R1                                      | 0.0939                                  | 0.1706     | 0.0981     | 0.1685     | 0.0871     | 0.1475    | 0.1373     | 0.1471    |         |
| R1 ( $I > 2\sigma$ )                    | 0.0691                                  | 0.0675     | 0.0612     | 0.0580     | 0.0518     | 0.0865    | 0.0897     | 0.0981    |         |
| wR2                                     | 0.1657                                  | 0.2116     | 0.1241     | 0.1735     | 0.1012     | 0.1988    | 0.2351     | 0.2618    |         |
| wR2 ( $I > 2\sigma$ )                   | 0.1527                                  | 0.1511     | 0.1097     | 0.1154     | 0.0871     | 0.1594    | 0.1972     | 0.2193    |         |
| Goof (restrained)                       | 1.084                                   | 1.025      | 1.078      | 0.940      | 1.040      | 0.941     | 1.042      | 1.140     |         |
| No. of parameters                       | 101                                     | 101        | 101        | 101        | 101        | 89        | 100        | 101       |         |
| No. of restraints                       | 1                                       | 79         | 79         | 79         | 1          | 145       | 85         | 79        |         |
| $\Delta\rho_{max}$ \ $e\text{\AA}^{-3}$ | 1.297                                   | 0.166      | 0.091      | 0.137      | 0.103      | 0.171     | 0.187      | 0.168     |         |
| $\Delta\rho_{min}$ \ $e\text{\AA}^{-3}$ | -0.298                                  | -0.176     | -0.120     | -0.154     | -0.105     | -0.173    | -0.209     | -0.176    |         |
| $\Delta\rho_{rms}$ \ $e\text{\AA}^{-3}$ | 0.093                                   | 0.046      | 0.030      | 0.040      | 0.028      | 0.050     | 0.063      | 0.054     |         |

## S1.5 Deposition

Structures mentioned in this paper were deposited as individual entries within Cambridge Structural Database. [Groom et al., 2016] The deposition numbers assigned to these 2 structures of 2"AP- $\alpha$ , 8 structures of 2"AP- $\beta$ , 3 structures of 2"AP- $\gamma$  and 3 structures of 2"AP- $\delta$  are between 2039408 and 2039423. Exact deposition number for each structure have been presented in Table S1.4.

**Table S1.4:** CCDC deposition numbers of crystal structures investigated in these studies, sorted by crystal phase and exerted pressure.

| Polymorph      | Pressure    | CCDC deposition number |
|----------------|-------------|------------------------|
| 2"AP- $\alpha$ | atmospheric | 2039413                |
|                | 0.34 GPa    | 2039408                |
| 2"AP- $\beta$  | atmospheric | 2039409                |
|                | 0.72 GPa    | 2039410                |
|                | 1.00 GPa    | 2039412                |
|                | 1.29 GPa    | 2039411                |
|                | 1.57 GPa    | 2039414                |
|                | 1.64 GPa    | 2039415                |
|                | 1.87 GPa    | 2039419                |
|                | 2.03 GPa    | 2039422                |
| 2"AP- $\gamma$ | 0.84 GPa    | 2039418                |
|                | 1.16 GPa    | 2039420                |
|                | 1.65 GPa    | 2039421                |
| 2"AP- $\delta$ | 0.88 GPa    | 2039416                |
|                | 0.98 GPa    | 2039423                |
|                | 2.12 GPa    | 2039417                |

## S1.6 Photographs

The micrographs were taken using Olympus SZX16 stereoscopic microscope, equipped in motorized XY-stage. The photographed samples were illuminated either with UV (365 nm) or visible light. The VL-6 UV lamp removed from the CN-6 Vilber dark-room was used as an external UV source.

## S1.7 Crystal Structure Prediction

In all cases, the molecule was first geometry minimized in the gas phase at the PBE0/6-31G(d,p) level of theory using Gaussian [Frisch et al., 2016]. Flexible torsion angles were determined through second derivatives and finite difference perturbations. Local approximate models (LAMs) were constructed by using a uniform

grid along the DOFs, at 120° increments, before running the adaptive LAM algorithm [Sugden et al., 2016] until converged to 5 kJ/mol accuracy, at the same level of theory.

Refinement of the crystal structure landscape of 2"AP was carried out using CrystalOptimizer [Kazantsev et al., 2011]. Multipoles up to rank 4 were generated using GAUSSIAN [Frisch et al., 2016] and GDMA with the PBE0 6-31G(d,p) level of theory. For the repulsion/dispersion potential, a novel set of transferable parameters were tested. These parameters were generated using the newly developed CrystalEstimator [Bowskill et al., 2021, Bowskill et al., 2020] software, using DFT optimized crystal structures as reference data. The parameters were derived to be consistent with the multipole-based calculations at the PBE0/6-31G(d,p) level of theory, and are applied at the CrystalOptimizer stage.

In CrystalEstimator, optimal parameter values (Table S1.5) are estimated by minimizing the discrepancy between model optimized crystal geometries and energies, with respect to some reference data. In this case, the reference data contains optimal crystal structures and energies for a variety of hydrocarbons, oxyhydrocarbons, and azo-hydrocarbons. Both the optimal geometries and energies are obtained from DFT-D calculations in VASP (version 5.4) using the TPSS function with the D3 correction. An energy cut off of 1000 eV was used for the plane waves. The Brillouin zone was sampled using a Gamma centered Monkhorst–Pack approximation at k-point grids separated by approximately  $0.025 \times 2\pi \text{ \AA}^{-1}$ . Crystal structures were relaxed with this model allowing the unit cell volume as well as the atomic positions to optimize. Structural relaxations were halted when the calculated force on every atom was less than  $0.01 \text{ eV \AA}^{-1}$ .

**Table S1.5:** Optimal transferable parameters determined by CrystalEstimator.

| Atom site 1 | Atom site 2 | A \ eV  | B \ Å        | C \ eVÅ <sup>6</sup> |
|-------------|-------------|---------|--------------|----------------------|
| C           | C           | 3640.77 | 0.277777778  | 25.26                |
| C           | H           | 374.36  | 0.272479564  | 4.58                 |
| C           | O           | 3379.62 | 0.264550265  | 17.03                |
| C           | N           | 2360.76 | 0.271002710  | 22.14                |
| H           | H           | 113.58  | 0.267379679  | 1.47                 |
| H           | O           | 280.90  | 0.259740260  | 2.62                 |
| H           | N           | 395.57  | 0.265957447  | 2.53                 |
| O           | O           | 878.91  | 0.252525253  | 6.38                 |
| O           | N           | 452.22  | 0.258397933  | 11.85                |
| N           | N           | 7603.01 | 0.2645502650 | 22.36                |

In total, 71 crystal structures were used in the fitting process. For this fitting, the A and C parameters of the Buckingham potential for each pairwise interaction type are estimated explicitly without use of combining rules. The electrostatic model used in combination with the Buckingham potential is a multipole based model, which is also generated at the PBE0 6-31G(d,p) level of theory for consistency with model used in CrystalOptimizer[Kazantsev et al., 2011].



## S1.8 Other Theoretical Calculations

A series of calculations using dispersion-corrected DFT and 6-31G\*\* basis set were performed in CRYSTAL17 with a tight k-point grid with at most  $0.026 \times 2\pi \text{\AA}^{-1}$  between k-points. [Dovesi et al., 2018] Values of band gaps, lattice energy and conformational energy (also called conformational stress in the text) were calculated. Crystal structures of 2"AP polymorphs in pressure range up to 6GPa (85% to 105% of experimental unit cell volume) as well single molecule geometry have been optimized. In all cases strict truncation criteria for the Coulomb and Exchange sums ( $10^{-7}$ ,  $10^{-7}$ ,  $10^{-7}$ ,  $10^{-7}$ ,  $10^{-29}$ ) were applied to ensure proper convergence of the calculations. Some of the aforementioned calculations were also performed in VASP v5.4.4 [Hafner, 2008] using the TPSS functional and D3 dispersion correction. The RMSD between lowest-pressure experimental and VASP-optimized structures of 2"AP- $\alpha$ ,  $\beta$ ,  $\gamma$  and  $\delta$  amounts to 0.076, 0.076, 0.116 and 0.108, respectively. Further details regarding methodology of these calculations can be found in CSP section of this document as well as in the main text.

In order to obtain values of lattice energy, defined as a difference between energy of optimized bulk containing one molecule and free molecule, periodic calculations assuming temperature of 0K and pressure of 0GPa were performed. The value was obtained as a sum of conformational and cohesive components. Conformational component was defined as a difference between energy of optimized bulk (per molecule) and energy of single molecule with bulk-derived geometry. Value of conformational stress was defined as a difference between energy of 2"AP molecules with bulk-derived geometry and optimized in vacuum.

**Table S1.6:** Alternative version of Table 2 from the main text, presenting 2"AP energy values obtained from aforementioned DFT calculations in CRYSTAL17. All values are given in  $\text{kJ mol}^{-1}$ , recalculated to one molecule of 2"AP.

| Structure      | $E_{\text{cohesive, no BSSE corr}}$ | $\Delta E_{\text{BSSE corr}}$ | $E_{\text{cohesive}}$ | $E_{\text{conformational}}$ | $E_{\text{lattice}}$ |
|----------------|-------------------------------------|-------------------------------|-----------------------|-----------------------------|----------------------|
| 2"AP- $\alpha$ | -239.8                              | +61.3                         | -178.5                | +6.0                        | -172.5               |
| 2"AP- $\beta$  | -239.5                              | +61.9                         | -177.6                | +4.5                        | -173.1               |
| 2"AP- $\gamma$ | -240.3                              | +62.3                         | -178.0                | +5.6                        | -172.4               |
| 2"AP- $\delta$ | -244.5                              | +63.0                         | -180.5                | +9.3                        | -171.2               |

High-pressure crystal structures of 2"AP- $\beta$ ,  $\gamma$  and  $\delta$  were obtained using CRYSTAL's EOS option, [Erba et al., 2014] where the optimization for ten evenly spaced unit cell volumes was performed automatically. Despite numerous attempts, during this process geometry of  $\alpha$  polymorph always inevitably drifted towards crystal structure of 2"AP- $\delta$  and the calculations diverged. A series of optimizations in pressure range up to 2GPa was performed manually, but as seen on Figures S5.1 or S5.7 the geometry and electron structure still appears to converge to that of 2"AP- $\delta$ .

**Table S1.7:** Detailed results of fitting theoretically optimized bulk structures of 2"AP- $\beta$ ,  $\gamma$  and  $\delta$  to Vinet equation of state, [Vinet et al., 1987] rescaled to one molecule in each case. Values corresponding to the most stable polymorph in given conditions were emphasized, while those corresponding to the second most stable polymorph were underlined. For graphical representation see Figure 5 in main text.

| Structure                       | 2"AP- $\beta$         | 2"AP- $\gamma$        | 2"AP- $\delta$        |
|---------------------------------|-----------------------|-----------------------|-----------------------|
| $V_0 \setminus \text{\AA}^3$    | 1263.8216             | 1234.9344             | 1238.3292             |
| $E_0 \setminus \text{AU}$       | -3682.71590832        | -3682.71402667        | -3682.71422151        |
| $B_0 \setminus \text{GPa}$      | 17.62                 | 17.94                 | 18.07                 |
| $B'_0 \setminus 1$              | 7.87                  | 8.22                  | 7.84                  |
| $E(0.0\text{GPa}) / \text{AU}$  | <b>-3682.71590832</b> | -3682.71402667        | <u>-3682.71422151</u> |
| $E(0.5\text{GPa}) / \text{AU}$  | <b>-3682.71413340</b> | -3682.71232799        | <u>-3682.71251934</u> |
| $E(1.0\text{GPa}) / \text{AU}$  | <b>-3682.70965956</b> | -3682.70805665        | <u>-3682.70821203</u> |
| $E(1.5\text{GPa}) / \text{AU}$  | <b>-3682.70329784</b> | -3682.70199360        | <u>-3682.70206846</u> |
| $E(2.0\text{GPa}) / \text{AU}$  | <b>-3682.69553184</b> | <u>-3682.69460120</u> | -3682.69455187        |
| $E(2.5\text{GPa}) / \text{AU}$  | <b>-3682.68667606</b> | <u>-3682.68617879</u> | -3682.68596563        |
| $E(3.0\text{GPa}) / \text{AU}$  | <u>-3682.67694794</u> | <b>-3682.67693256</b> | -3682.67652056        |
| $E(3.5\text{GPa}) / \text{AU}$  | <u>-3682.66650478</u> | <b>-3682.66701128</b> | -3682.66636977        |
| $E(4.0\text{GPa}) / \text{AU}$  | -3682.65546414        | <b>-3682.65652629</b> | <u>-3682.65562827</u> |
| $E(4.5\text{GPa}) / \text{AU}$  | -3682.64391692        | <b>-3682.64556314</b> | <u>-3682.64438485</u> |
| $E(5.0\text{GPa}) / \text{AU}$  | -3682.63193456        | <b>-3682.63418926</b> | <u>-3682.63270982</u> |
| $E(6.0\text{GPa}) / \text{AU}$  | -3682.60688360        | <b>-3682.61041568</b> | <u>-3682.60828017</u> |
| $E(7.0\text{GPa}) / \text{AU}$  | -3682.58065838        | <b>-3682.58553219</b> | <u>-3682.58268129</u> |
| $E(8.0\text{GPa}) / \text{AU}$  | -3682.55350106        | <b>-3682.55976671</b> | <u>-3682.55615263</u> |
| $E(9.0\text{GPa}) / \text{AU}$  | -3682.52558794        | <b>-3682.53328512</b> | <u>-3682.52886876</u> |
| $E(10.0\text{GPa}) / \text{AU}$ | -3682.49705176        | <b>-3682.50621207</b> | <u>-3682.50096113</u> |

# Chapter S2

## Structure description

### S2.1 Phase transitions of 2"AP- $\alpha$

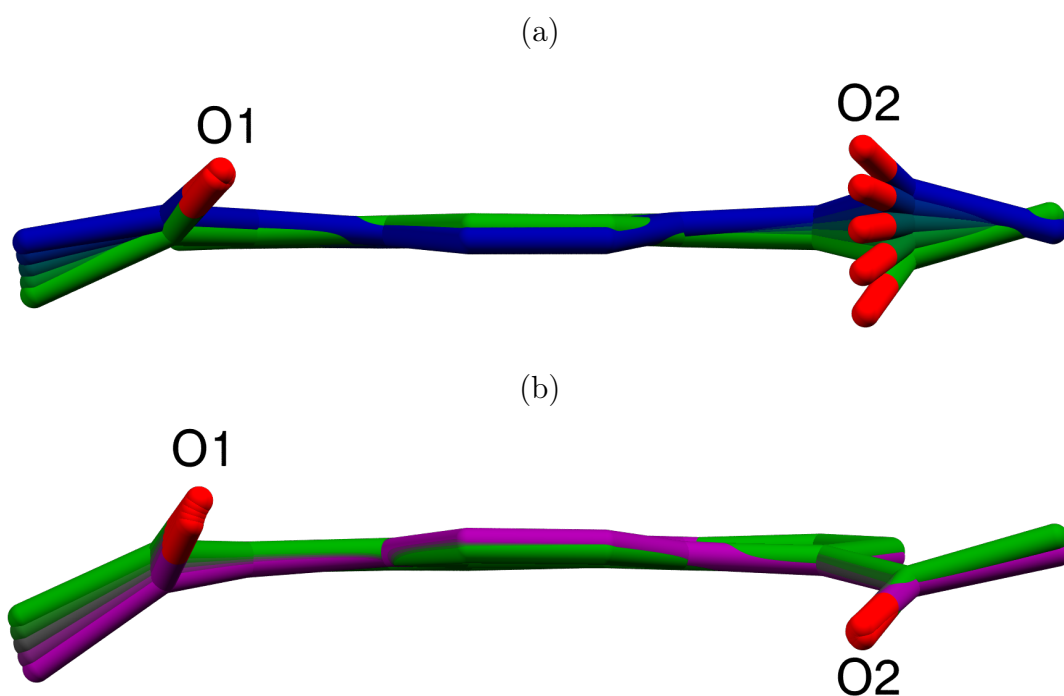

**Figure S2.1:** Change of side chain conformation between single molecules of polymorphs a)  $\alpha$  (green) and  $\gamma$  (blue); b)  $\alpha$  and  $\delta$  (purple), with intermediate structures introduced to guide the eye. Phase transfer to 2"AP- $\gamma$ , while more optical energy-wise, is accompanied by a significant structural changes, due to the conformation switching from cis to trans. Meanwhile, kinetically favoured transition to 2"AP- $\delta$  is accompanied only by a minor rotation of  $\delta_1$ .

## S2.2 Comparison of 2"AP- $\alpha$ , 2"AP- $\beta$ with optimized free molecule

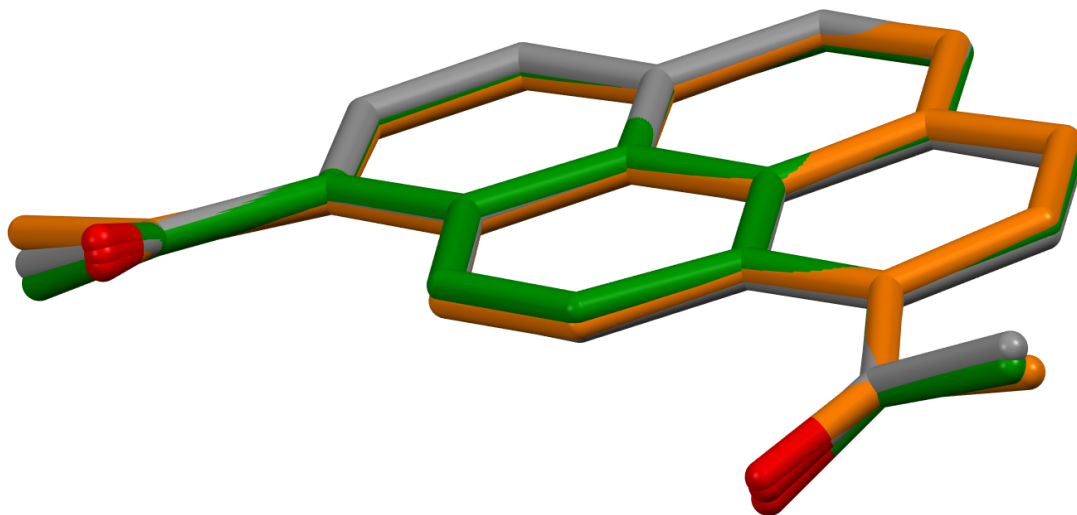

**Figure S2.2:** Overlay of single molecules of 2"AP- $\alpha$  (green), 2"AP- $\beta$  (orange) and free 2"AP molecule (gray) optimized in gas phase for the sake of electronic structure calculations. Due to the structural rigidity discussed in the main text, deviations between optimized and measured components do not exceed  $0.3\text{\AA}$ , while the RMSD between free molecule and  $\alpha$  /  $\beta$  for overlay of all non-hydrogen atoms equals  $0.0858\text{\AA}$  /  $0.0981\text{\AA}$ , respectively. Hydrogen atoms have been omitted for clarity.

# Chapter S3

## Lattice interactions

### S3.1 The most important intermolecular interactions

Estimation of intermolecular interaction energy for all 2"AP crystal forms have been performed in CrystalExplorer17, [M. J. Turner et al., 2017] using cluster DFT/B3LYP calculations and standard 6-31G\*\* database. The cluster included all molecules whose closest distance to central molecule was below 3.8Å. Initial geometry in all cases was based on crystal structures optimized in 0GPa and 0K using CRYSTAL17 software. [Dovesi et al., 2018]

Apart from investigated central moiety, the cluster of all four crystal forms included 14 symmetry related molecules: 9 independent ones in case of 2"AP- $\alpha$ ,  $\gamma$ , and  $\delta$ , and 4 independent ones in case of 2"AP- $\beta$ . While technically it included also a fifteenth molecule in the case of the  $\delta$  polymorph, this moiety was disregarded for the sake of further analysis due to lack of easily explainable interaction path, relatively large distance, and neglectible strength of interaction with the central moiety. This moiety was also absent in otherwise analogous clusters of 2"AP- $\alpha$  and 2"AP- $\gamma$ .

Obtained values of interaction energy, summarized in Tables S3.1 and S3.2 unsurprisingly identifies  $\pi$ -stacking interaction to be crucial for overall sample stability in all investigated cases. It should be noted that all interaction featuring potential attraction between acetyl moieties are significantly attractive. Values consistently below  $-10\text{kJ mol}^{-1}$  suggest that the side chains aren't only responsible for steric repulsion, but rather play an active role in stabilizing the overall crystal structure.

While individual values output by CrystalExplorer can not be directly translated into lattice energy, a sum of interactions between one molecules and its neighbors should correlate well with the value of cohesive energy from periodic calculations. Since in all cases the cluster consists of 14 molecules, the average interaction strengths should be comparable and reflect the importance of intermolecular forces in each case. Based on this assumption we can see that the  $\delta$  polymorph indeed benefits from adopting unfavorable molecular conformation, as its average interaction energy is the most negative among four investigated cases. At the same time we have observed 2"AP- $\beta$ 's molecules to assume conformation very close to the optimized minimum, so naturally its average interaction strength is expected to be the lowest out of all four crystal forms.

**Table S3.1:** Intermolecular interactions in 2"AP polymorphs  $\alpha$ ,  $\gamma$ , and  $\delta$  found between molecules within 3.8Å range. The values have been estimated by Crystal Explorer based on crystal structures optimized in 0K and 0GPa.

|                                                       | main interaction | relative placement     | related by     | interaction energy \ kJ mol <sup>-1</sup> |                |                |
|-------------------------------------------------------|------------------|------------------------|----------------|-------------------------------------------|----------------|----------------|
|                                                       |                  |                        |                | 2"AP- $\alpha$                            | 2"AP- $\gamma$ | 2"AP- $\delta$ |
| I                                                     | $\pi$ -stacking  | same slab <sup>†</sup> | -1             | -53.0                                     | -32.9          | -60.4          |
| II                                                    | $\pi$ -stacking  | same slab <sup>†</sup> | -1             | -45.7                                     | -59.6          | -49.9          |
| III                                                   | $\pi$ -stacking  | same slab <sup>†</sup> | <i>c</i>       | -40.7                                     | -41.6          | -38.2          |
| IV                                                    | C-H... O         | next slab <sup>†</sup> | 1              | -24.3                                     | -29.2          | -24.0          |
| V                                                     | C-H... O         | next slab <sup>†</sup> | -1             | -18.6                                     | -23.2          | -22.3          |
| VI                                                    | C-H... O         | next slab <sup>†</sup> | <i>c</i>       | -14.5                                     | -10.5          | -12.8          |
| VII                                                   | C-H... H-C       | same ribbon            | 2 <sub>1</sub> | -11.2                                     | -11.8          | -12.0          |
| VIII                                                  | C-H... H-C       | next slab <sup>†</sup> | 2 <sub>1</sub> | -8.2                                      | -10.4          | -8.0           |
| IX                                                    | C-H... H-C       | next slab <sup>†</sup> | -1             | -0.5                                      | -2.5           | -1.0           |
| X*                                                    | O... O           | next slab <sup>†</sup> | -1             | -                                         | -              | +0.8           |
| Average interaction energy within slab <sup>†</sup>   |                  |                        |                | -33.8                                     | -33.2          | -35.1*         |
| Average interaction energy between slabs <sup>†</sup> |                  |                        |                | -14.1                                     | -15.7          | -14.1*         |
| Average interaction energy in overall                 |                  |                        |                | -22.5                                     | -23.2          | -23.1*         |

\*X has been excluded from average interaction energy calculations

<sup>†</sup> "slab" denotes a 2D "brick-layer" stack of molecules infinite along **X** and **Y**

**Table S3.2:** Intermolecular interactions in 2"AP polymorph  $\beta$  found between molecules within 3.8Å range. The values have been estimated by Crystal Explorer based on crystal structures optimized in 0K and 0GPa.

|                                           | main interaction | relative placement | related by | interaction energy \ kJ mol <sup>-1</sup> |
|-------------------------------------------|------------------|--------------------|------------|-------------------------------------------|
|                                           |                  |                    |            | 2"AP- $\beta$                             |
| XI                                        | $\pi$ -stacking  | same stack         | 1          | -60.0                                     |
| XII                                       | C-H... O         | next stack         | <i>F</i>   | -18.2                                     |
| XIII                                      | C-H... O         | next stack         | <i>d</i>   | -15.5                                     |
| XIV                                       | C-H... $\pi$     | next stack         | <i>d</i>   | -5.1                                      |
| Average interaction energy within stack   |                  |                    |            | -60.0                                     |
| Average interaction energy between stacks |                  |                    |            | -12.9                                     |
| Average interaction energy in overall     |                  |                    |            | -19.7                                     |

# Chapter S4

## Distinct spectroscopic properties of 2"AP polymorphs

### S4.1 Luminescence of 2"AP in the solid state

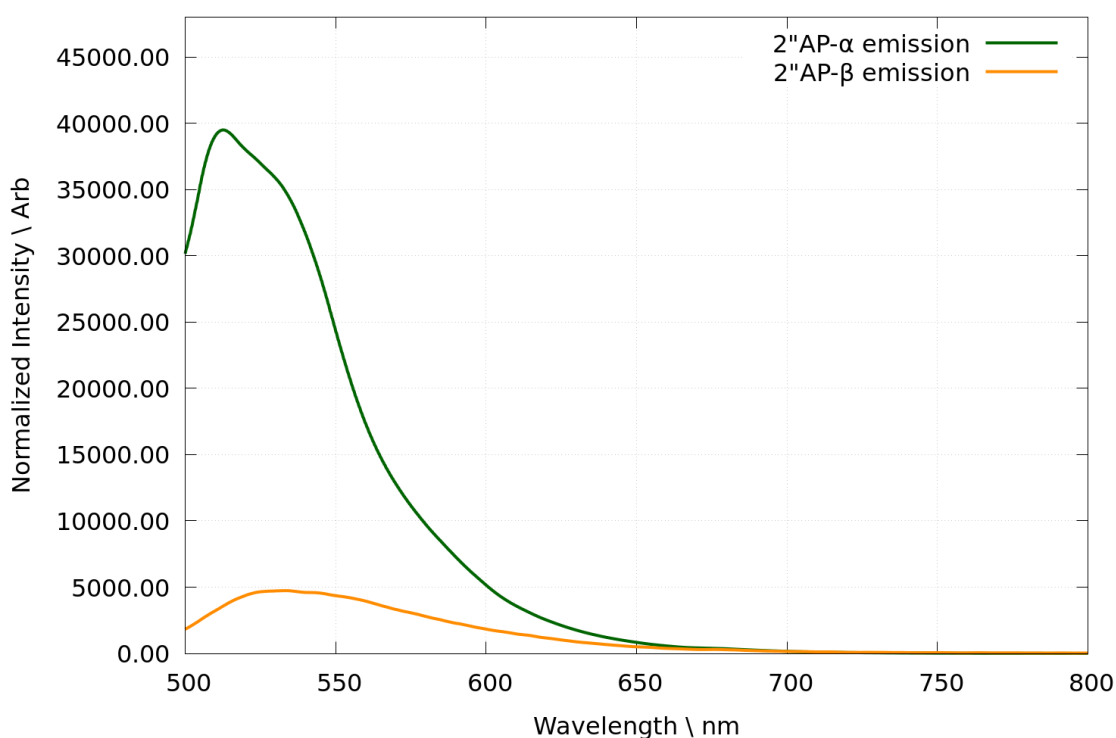

**Figure S4.1:** Steady state excitation and fluorescence spectra of 2"AP  $\alpha$  and  $\beta$  single crystals under ambient conditions. Excitation spectra were recorded at 515 nm and 535 nm for  $\alpha$  and  $\beta$  samples accordingly, while both emission spectra were recorded at 475 nm. Intensities were registered for single crystals of comparable same size at the same experimental conditions (i.e.: the same intensity of the source, same filter / diaphragm settings and the same size of the irradiated area on the crystal).

## S4.2 Fluorescence decay curves

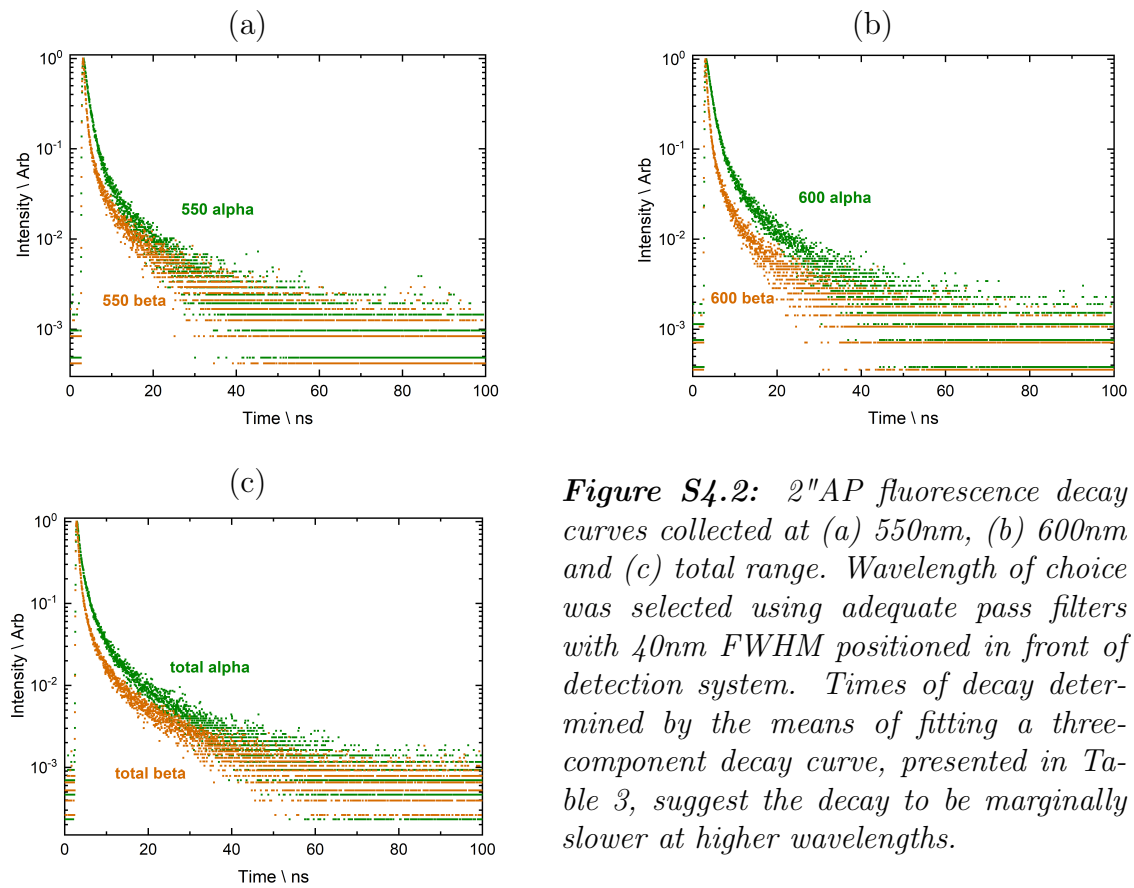

*Figure S4.2: 2<sup>nd</sup>AP fluorescence decay curves collected at (a) 550nm, (b) 600nm and (c) total range. Wavelength of choice was selected using adequate pass filters with 40nm FWHM positioned in front of detection system. Times of decay determined by the means of fitting a three-component decay curve, presented in Table 3, suggest the decay to be marginally slower at higher wavelengths.*



### S4.3 Solid-state Raman spectra - a detailed band assignment

Raman spectra of the studied polymorphic structures of 2"AP were collected in order to examine differences in the crystals on a molecular level (Figure 4 in the manuscript). Both spectra exhibit several strong bands in the range between  $1200\text{ cm}^{-1}$  and  $1700\text{ cm}^{-1}$ . For the  $\alpha$  polymorph, the most prominent ones are situated at  $1229$ ,  $1377$ ,  $1592$  and  $1620\text{ cm}^{-1}$  and can be assigned to various ring vibrations. [Carrasco et al., 2003, Xie et al., 2010, Gu et al., 2013] The band at  $1229\text{ cm}^{-1}$  comes from CH bending vibrations which are usually found between  $1000$  and  $1300\text{ cm}^{-1}$ . Another interesting spectral region in the spectra of aromatic hydrocarbons is the  $1350$ - $1500\text{ cm}^{-1}$  range, where strong CH in-plane bending coupled with weak ring breathing modes are manifested. While a few bands in this area can be distinguished, the one at  $1377\text{ cm}^{-1}$  has the highest intensity. Subsequently, we attribute several bands in the  $1550$ - $1650\text{ cm}^{-1}$  region, namely  $1568$ ,  $1592$ ,  $1602$  and  $1619\text{ cm}^{-1}$ , to ring-stretching vibrations with some contribution of CH in-plane bending. Finally, the position of the remaining band of medium intensity at  $1671\text{ cm}^{-1}$  is characteristic to carbonyl group vibration, observed e.g. in acetophenone and other aromatic derivatives. [Jayaraj et al., 1996, Sajan et al., 2006]

### S4.4 Fluorescence as a function of pressure

**Table S4.1:** Listing of fluorescence peak positions as a function of pressure. The values were obtained by fitting a gauss curve to the highest peak of each spectrum.

| pressure<br>\ GPa | peak position<br>\ nm | pressure<br>\ GPa | peak position<br>\ nm | pressure<br>\ GPa | peak position<br>\ nm |
|-------------------|-----------------------|-------------------|-----------------------|-------------------|-----------------------|
| 2"AP- $\alpha$    |                       | 2"AP- $\delta$    |                       | 2"AP- $\beta$     |                       |
| 0.00              | 519.79                | 1.61              | 572.41                | 0.00              | 538.47                |
| 0.27              | 534.52                | 2.24              | 586.69                | 0.81              | 582.65                |
| 0.50              | 539.40                | 2.55              | 599.30                | 1.25              | 592.58                |
| 0.74              | 544.34                | 2.99              | 614.47                | 1.93              | 605.05                |
| 0.90              | 545.30                | 3.36              | 622.32                | 2.39              | 613.83                |
|                   |                       | 3.83              | 627.62                | 2.93              | 622.04                |
|                   |                       | 4.15              | 635.30                | 3.02              | 628.28                |
|                   |                       | 4.70              | 643.60                | 3.56              | 635.22                |
|                   |                       |                   |                       | 3.92              | 641.76                |

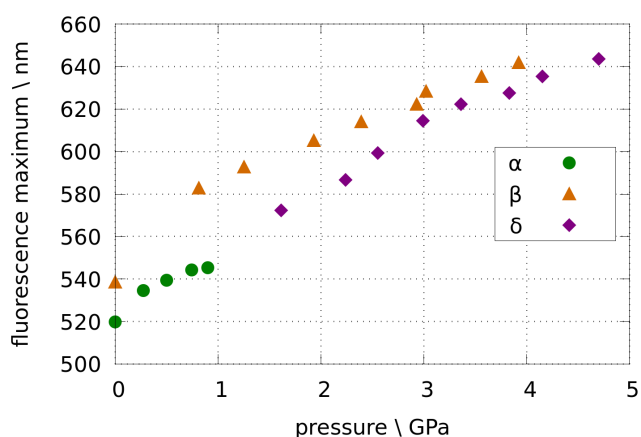

**Figure S4.3:** Visualisation of fluorescence peak positions as a function of pressure. The values were obtained by fitting a gauss curve to the highest peak of each spectrum.

## S4.5 Comments on the former works regarding spectroscopic properties of 2"AP in the solid state

There were some major inconsistencies concerning solid state fluorescence study in the publication of Rajagopal et.al [Rajagopal et al., 2014]. Photographs of UV-illuminated crystals of 2"AP in that work (Scheme 1) indicate that:

- a in the case of compounds 2AP and 2'AP luminescence is blue and green (i.e. with maxima around 450 and 525 nm accordingly) contrary to solid-state luminescence maxima of 602 and 567 nm reported in Table S7 and Figure S12,
- b the sample marked as 2"AP luminesces in green, consistent with current study and inconsistent with Table S7,
- c in the part concerning 2"AP luminescence in solution the maxima are given at 413 and 535 nm, whereas spectra in Figure S10 d suggest maxima 413 and 435 nm,
- d in the case if 2"AP the samples under visible and UV illumination are clearly not the same.

# Chapter S5

## Theoretical calculations

### S5.1 Conformational landscape of 2"AP

The analysis of 2"AP's conformational landscape was performed in CRYSTAL17, using dispersion-corrected DFT and 6-31G\*\* basis set. The truncation criteria parameters were increased slightly. Contrary to previously described periodic calculations, these optimizations were performed using redundant internal parameters. This was necessary to impose restraints on values of two dihedral angles:  $\delta_1$  (O1 – C17 – C1 – C2) and  $\delta_2$  (O2 – C19 – C6 – C5), which were then both varied in range from  $-35^\circ$  to  $35^\circ$  every 5 degrees. While scans with more intermediate coordinate values and larger scanning range were attempted, they included points which did not converge and as such were discontinued.

The procedure was found to depend on optimization path. Structures with the same dihedral constraints but different starting points were found to differ in final values of conformational stress by up to 15%. For that reason the scanning procedure was repeated four times using different optimization paths each time. Two starting geometries were obtained by optimizing an experiment-derived structure with restraints imposed on the values of dihedral angles:  $\delta_1 = \delta_2 = +35^\circ$  in one,  $\delta_1 = \delta_2 = -35^\circ$  in another. The scanning was then performed by varying one variable slowly and changing the other rapidly, as visualised in Figure S5.5.

The results were further corrected for molecule's internal symmetry: since in individual molecule acetyl moieties are indistinguishable, switching their labels should not influence final result. The same goes for positive and negative angle values, as rotation of individual group in both directions introduced analogous changes. Because of these symmetry restraints, values for the following pairs:  $(\delta_1; \delta_2)$ ,  $(\delta_2; \delta_1)$ ,  $(-\delta_1; -\delta_2)$  and  $(-\delta_2; -\delta_1)$  should be theoretically identical. Averaging energy values on those points and rescaling them so that minimum equals 0 yields final results described in main text.

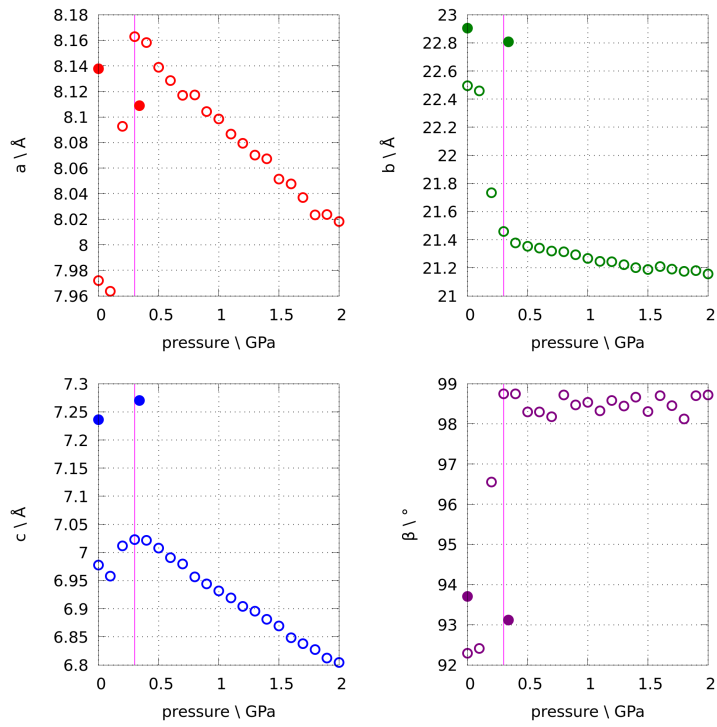

**Figure S5.1:** Evolution of 2''AP- $\alpha$ 's experimental (full circles) and optimized (empty circles) unit cell parameters with exerted pressure. Note that above 0.3GPa (pink line) the parameters match those of  $\delta$  due to in silico phase transition.

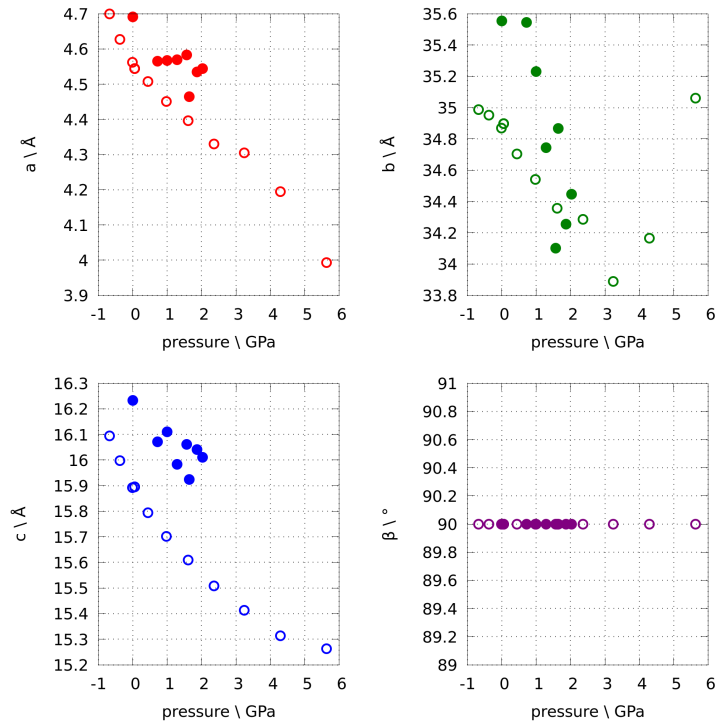

**Figure S5.2:** Evolution of 2''AP- $\beta$ 's experimental (full circles) and optimized (empty circles) unit cell parameters with exerted pressure.

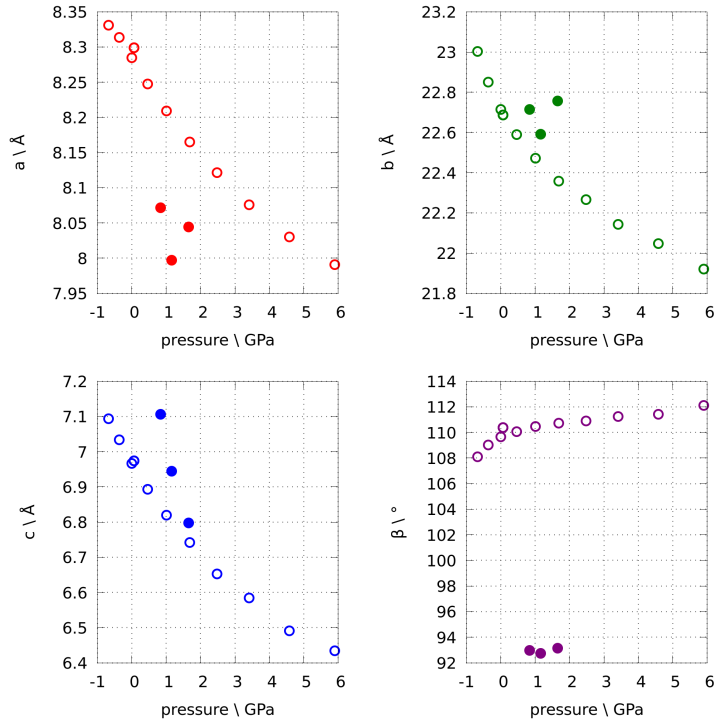

**Figure S5.3:** Evolution of 2''AP- $\gamma$ 's experimental (full circles) and optimized (empty circles) unit cell parameters with exerted pressure.

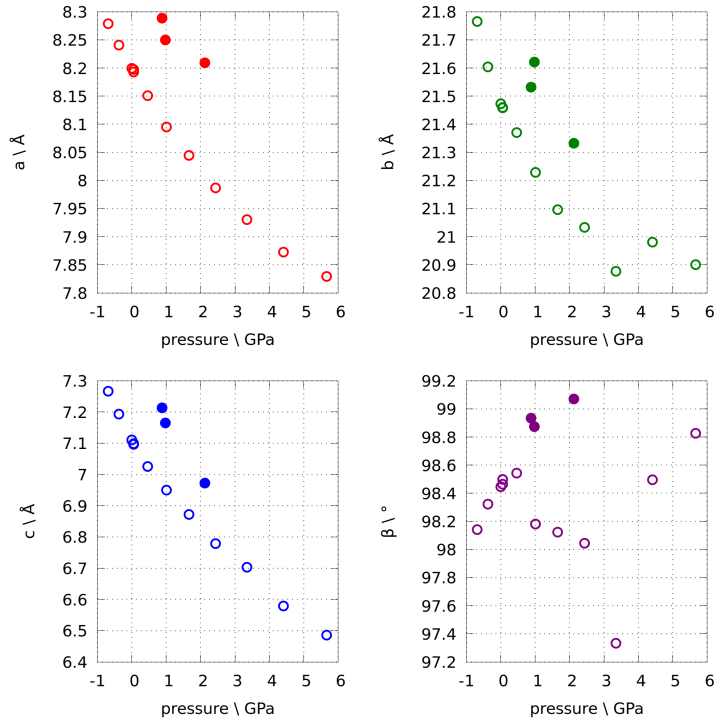

**Figure S5.4:** Evolution of 2''AP- $\delta$ 's experimental (full circles) and optimized (empty circles) unit cell parameters with exerted pressure.

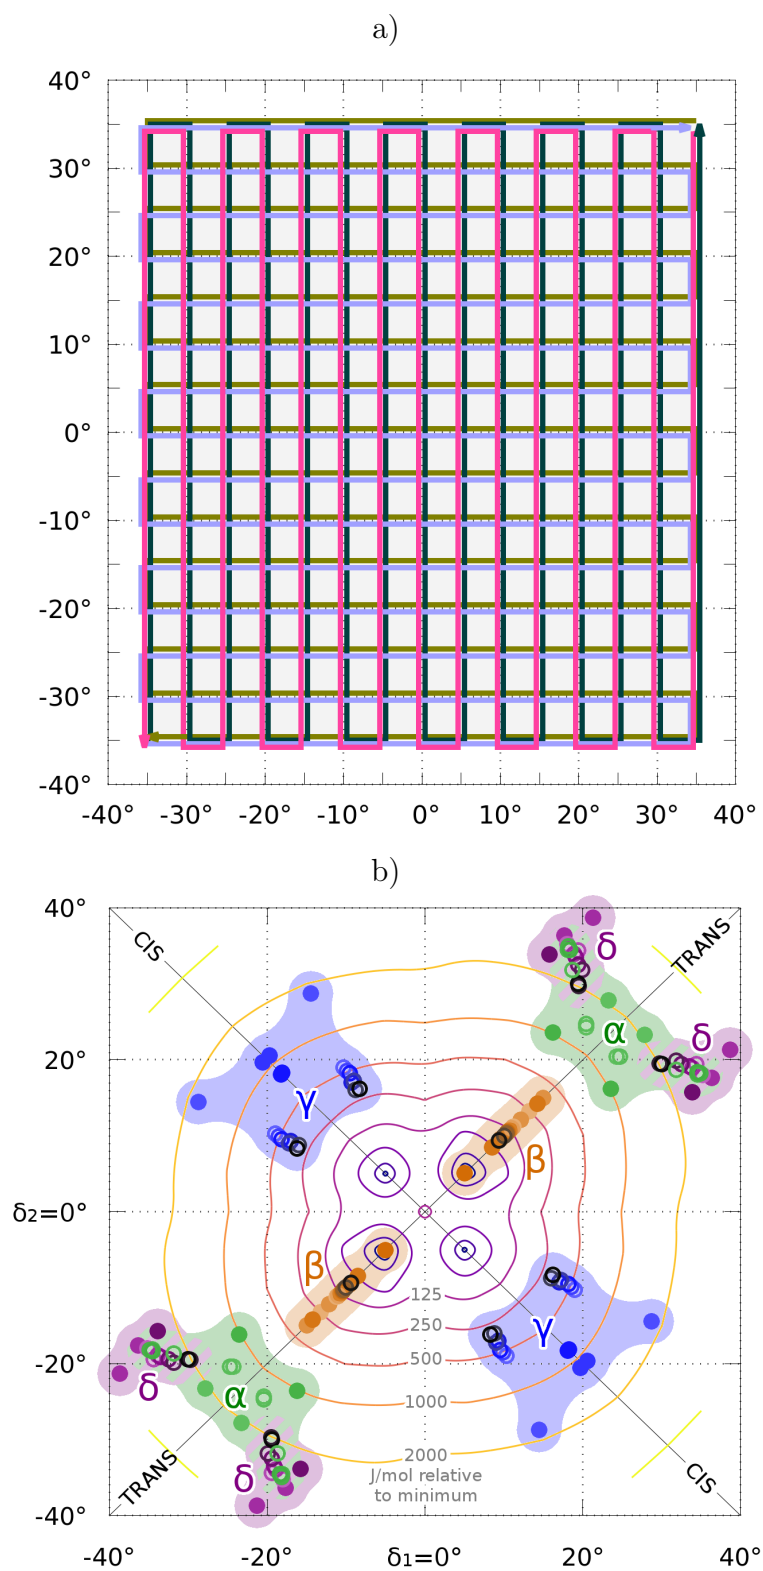

**Figure S5.5:** a) Four scanning paths (coloured gold, violet, magenta and dark green) used to obtain values of conformational energy in investigated  $\delta_1$ - $\delta_2$  range. b) Potential energy landscape figure from main text repeated for reference.

## S5.2 Electronic excitations in 2"AP

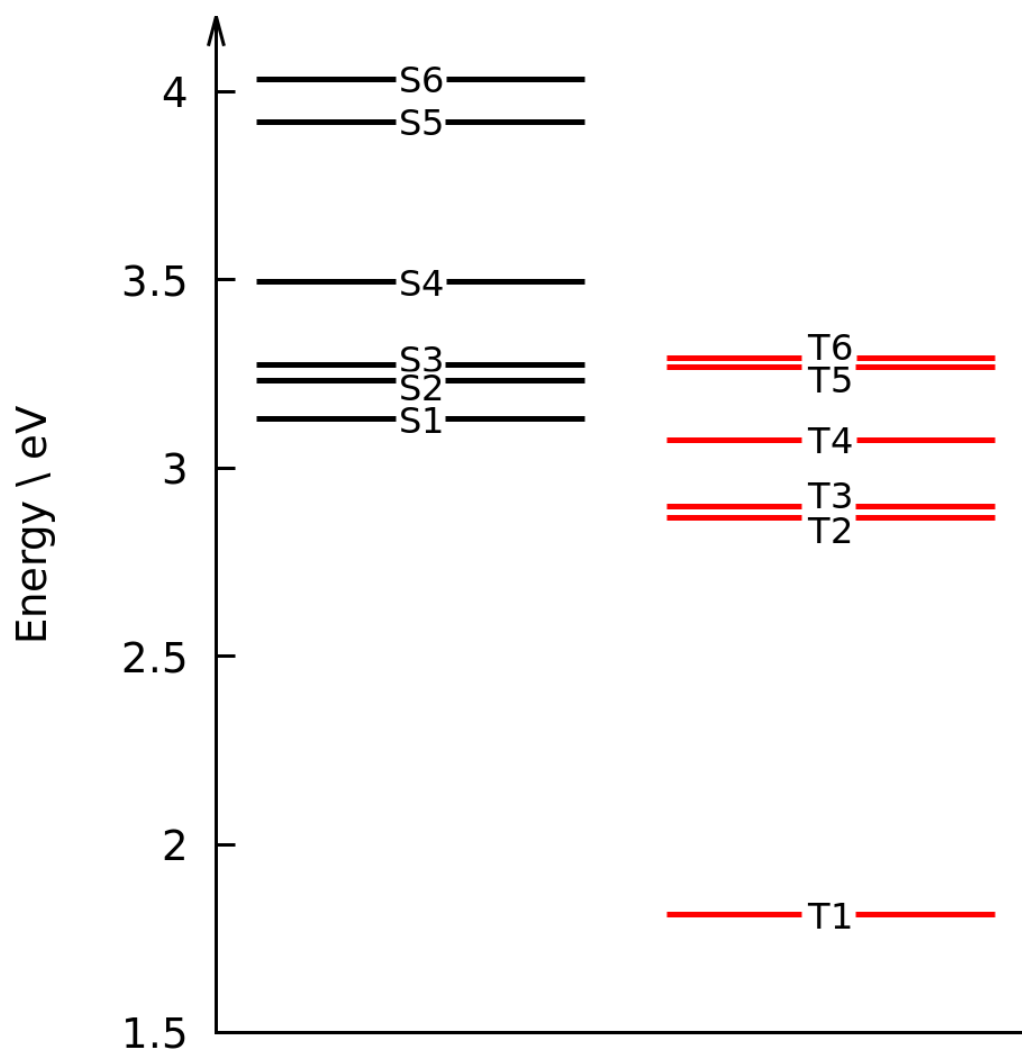

**Figure S5.6:** Energy level diagram for molecular 2''AP. Excited singlet states represented in black, while triplet states - in red.

**Table S5.1:** Excitation energy, oscillator strength, main transition orbital, and their contribution calculated for molecular 2"AP using TD-DFT (B3LYP/6-311G\*\*).

| Excitation          | Main transition orbitals                                          | Contribution<br>\< % | $\Delta E$<br>\< eV | $\lambda$<br>\< nm | f      |
|---------------------|-------------------------------------------------------------------|----------------------|---------------------|--------------------|--------|
| S0 $\rightarrow$ S6 | H $\rightarrow$ L+1 $\pi \rightarrow \pi^*$                       | 0.60                 | 4.0339              | 307.36             | 0.1703 |
| S0 $\rightarrow$ S5 | H-4 $\rightarrow$ L $\pi \rightarrow \pi^*$                       | 0.96                 | 3.9201              | 316.27             | 0.0194 |
| S0 $\rightarrow$ S4 | H-3 $\rightarrow$ L $n \rightarrow \pi^* / \pi \rightarrow \pi^*$ | 0.39                 | 3.4949              | 354.76             | 0.0028 |
|                     | H $\rightarrow$ L+1 $\pi \rightarrow \pi^*$                       | 0.32                 |                     |                    |        |
|                     | H-2 $\rightarrow$ L $n \rightarrow \pi^* / \pi \rightarrow \pi^*$ | 0.24                 |                     |                    |        |
| S0 $\rightarrow$ T6 | H-4 $\rightarrow$ L $\pi \rightarrow \pi^*$                       | 0.75                 | 3.2914              | 376.69             | 0      |
| S0 $\rightarrow$ S3 | H-2 $\rightarrow$ L $n \rightarrow \pi^* / \pi \rightarrow \pi^*$ | 0.52                 | 3.2741              | 378.68             | 0.0001 |
|                     | H-3 $\rightarrow$ L $n \rightarrow \pi^* / \pi \rightarrow \pi^*$ | 0.36                 |                     |                    |        |
| S0 $\rightarrow$ T5 | H $\rightarrow$ L+1 $\pi \rightarrow \pi^*$                       | 0.68                 | 3.2697              | 379.19             | 0      |
| S0 $\rightarrow$ S2 | H-1 $\rightarrow$ L $n \rightarrow \pi^*$                         | 0.88                 | 3.2316              | 383.66             | 0.0044 |
| S0 $\rightarrow$ S1 | H $\rightarrow$ L $\pi \rightarrow \pi^*$                         | 0.94                 | 3.1303              | 396.07             | 0.4224 |
| S0 $\rightarrow$ T4 | H-3 $\rightarrow$ L $n \rightarrow \pi^* / \pi \rightarrow \pi^*$ | 0.45                 | 3.0743              | 403.29             | 0      |
|                     | H-2 $\rightarrow$ L $n \rightarrow \pi^* / \pi \rightarrow \pi^*$ | 0.38                 |                     |                    |        |
| S0 $\rightarrow$ T3 | H-2 $\rightarrow$ L $n \rightarrow \pi^* / \pi \rightarrow \pi^*$ | 0.47                 | 2.8973              | 427.93             | 0      |
|                     | H-3 $\rightarrow$ L $n \rightarrow \pi^* / \pi \rightarrow \pi^*$ | 0.27                 |                     |                    |        |
| S0 $\rightarrow$ T2 | H-1 $\rightarrow$ L $n \rightarrow \pi^*$                         | 0.76                 | 2.8674              | 432.39             | 0      |
| S0 $\rightarrow$ T1 | H $\rightarrow$ L $\pi \rightarrow \pi^*$                         | 0.95                 | 1.8124              | 684.09             | 0      |

**Table S5.2:** DFT-derived energy values corresponding to molecular orbitals of 2"AP presented in Figure 6 in main text.

| Orbital | Character | Energy \< eV |
|---------|-----------|--------------|
| LUMO+1  | $\pi^*$   | -1.74        |
| LUMO    | $\pi^*$   | -2.82        |
| HOMO    | $\pi$     | -6.12        |
| HOMO-1  | n         | -6.98        |
| HOMO-2  | n/ $\pi$  | -6.99        |
| HOMO-3  | n/ $\pi$  | -7.09        |
| HOMO-4  | $\pi$     | -7.50        |



### S5.3 Band gaps

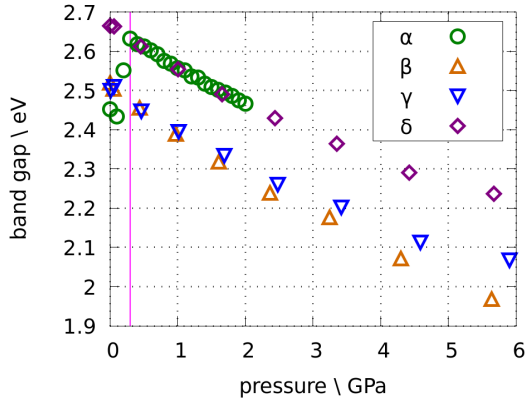

*Figure S5.7: Evolution of calculated band gap for four discussed 2''AP crystal forms. Values for the  $\alpha$  phase were probed more densely and show the moment of its in-silico phase transfer to 2''AP- $\delta$  around 0.2 GPa.*

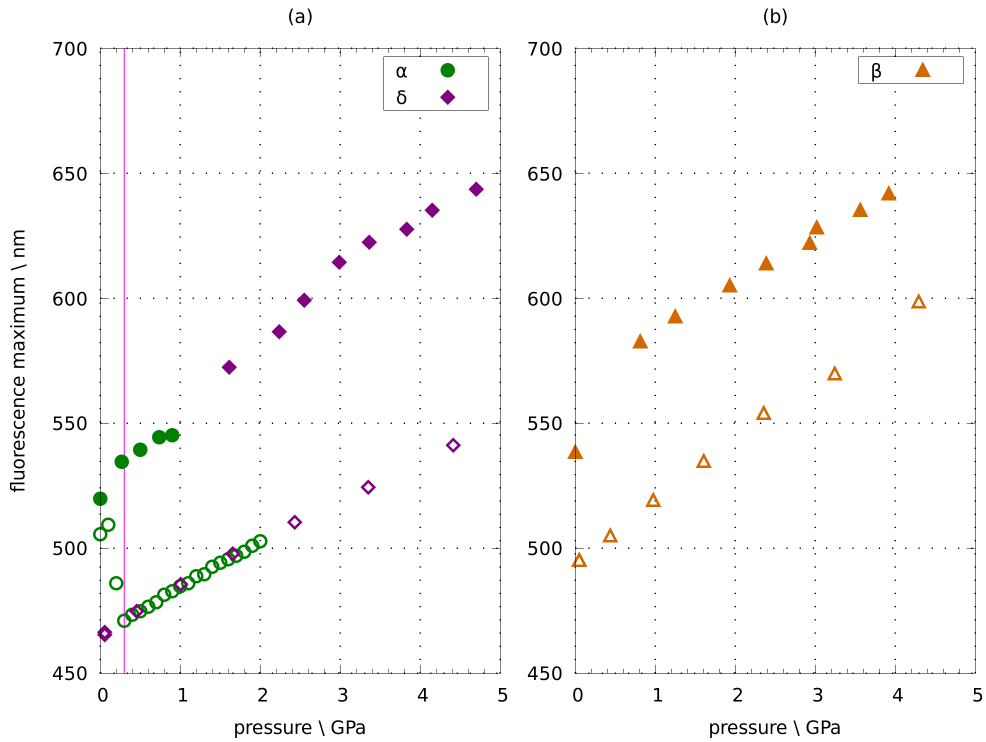

*Figure S5.8: Comparison of emission wavelength obtained by fitting a Gauss curve to experimental spectra (Figure S4.3, full points) and excitation wavelength from theoretical band gap span (Figure S5.7, hollow points). Note that above 0.3GPa (pink line) optimised values for  $\alpha$  match those of  $\delta$  due to in silico phase transition.*

**Table S5.3:** Band gap extent and resulting hypothetical peak absorption wavelength calculated in CRYSTAL17 as a function of pressure. Presented band gap values have been also visualized in Figure S5.7.

| Pressure<br>\ GPa | Band Gap<br>\ eV | Calculated<br>absorption \ nm | Pressure<br>\ GPa | Band Gap<br>\ eV | Calculated<br>absorption \ nm |
|-------------------|------------------|-------------------------------|-------------------|------------------|-------------------------------|
| 2"AP- $\alpha$    |                  |                               | 2"AP- $\gamma$    |                  |                               |
| 0                 | 2.4519           | 505.67                        | 0.00              | 2.5001           | 495.92                        |
| 0.1               | 2.4337           | 509.45                        | 0.06              | 2.5102           | 493.92                        |
| 0.2               | 2.5511           | 486.00                        | 0.46              | 2.4485           | 506.37                        |
| 0.3               | 2.6322           | 471.03                        | 1.01              | 2.3952           | 517.64                        |
| 0.4               | 2.6185           | 473.49                        | 1.68              | 2.3347           | 531.05                        |
| 0.5               | 2.6115           | 474.76                        | 2.48              | 2.2610           | 548.36                        |
| 0.6               | 2.6018           | 476.53                        | 3.42              | 2.2021           | 563.03                        |
| 0.7               | 2.5921           | 478.32                        | 4.59              | 2.1135           | 586.63                        |
| 0.8               | 2.5751           | 481.47                        | 5.90              | 2.0685           | 599.39                        |
| 0.9               | 2.5684           | 482.73                        | 2"AP- $\delta$    |                  |                               |
| 1                 | 2.5574           | 484.81                        | 0.00              | 2.6651           | 465.21                        |
| 1.1               | 2.5512           | 485.98                        | 0.06              | 2.6636           | 465.48                        |
| 1.2               | 2.5363           | 488.84                        | 0.46              | 2.6116           | 474.74                        |
| 1.3               | 2.5327           | 489.53                        | 1.00              | 2.5536           | 485.53                        |
| 1.4               | 2.5170           | 492.59                        | 1.66              | 2.4906           | 497.81                        |
| 1.5               | 2.5092           | 494.12                        | 2.43              | 2.4294           | 510.35                        |
| 1.6               | 2.5017           | 495.60                        | 3.35              | 2.3644           | 524.38                        |
| 1.7               | 2.4942           | 497.09                        | 4.42              | 2.2908           | 541.23                        |
| 1.8               | 2.4862           | 498.69                        | 5.67              | 2.2361           | 554.47                        |
| 1.9               | 2.4747           | 501.01                        | 2"AP- $\beta$     |                  |                               |
| 2                 | 2.4657           | 502.84                        | 0.00              | 2.5182           | 492.35                        |
| 0.00              | 2.5182           | 492.35                        | 0.05              | 2.5035           | 495.24                        |
| 0.05              | 2.5035           | 495.24                        | 0.44              | 2.4552           | 504.99                        |
| 0.44              | 2.4552           | 504.99                        | 0.97              | 2.3876           | 519.28                        |
| 0.97              | 2.3876           | 519.28                        | 1.61              | 2.3181           | 534.85                        |
| 1.61              | 2.3181           | 534.85                        | 2.36              | 2.2383           | 553.92                        |
| 2.36              | 2.2383           | 553.92                        | 3.25              | 2.1762           | 569.73                        |
| 3.25              | 2.1762           | 569.73                        | 4.40              | 2.0713           | 598.58                        |
| 4.40              | 2.0713           | 598.58                        | 5.64              | 1.9675           | 630.16                        |
| 5.64              | 1.9675           | 630.16                        |                   |                  |                               |

# Chapter S6

## Bibliography

- [Bowskill et al., 2021] Bowskill, D. H., Sugden, I. J., Adjiman, C. S., and Pantelides, C. C. (2021). A reliable and efficient parameter estimation methodology for crystal structure prediction. part 1: Transferable models consistent with point charges. (in preparation).
- [Bowskill et al., 2020] Bowskill, D. H., Sugden, I. J., George, N., Keates, A., Webb, J., Pantelides, C. C., and Adjiman, C. S. (2020). Efficient Parameterization of a Surrogate Model of Molecular Interactions in Crystals. In Pierucci, S., Manenti, F., Bozzano, G. L., and Manca, D., editors, *Computer Aided Chemical Engineering*, volume 48 of *30 European Symposium on Computer Aided Process Engineering*, pages 493–498. Elsevier.
- [Carrasco et al., 2003] Carrasco, E. A., Campos-Vallette, M., Leyton, P., Diaz, G., Clavijo, R. E., García-Ramos, J. V., Inostroza, N., Domingo, C., Sanchez-Cortes, S., and Koch, R. (2003). Study of the interaction of pollutant nitro polycyclic aromatic hydrocarbons with different metallic surfaces by surface-enhanced vibrational spectroscopy (sers and seir). *The Journal of Physical Chemistry A*, 107(45):9611–9619.
- [Dovesi et al., 2018] Dovesi, R., Erba, A., Orlando, R., Zicovich-Wilson, C. M., Civalieri, B., Maschio, L., Rérat, M., Casassa, S., Baima, J., Salustro, S., and Kirtman, B. (2018). Quantum-mechanical condensed matter simulations with CRYSTAL. *Wiley Interdisciplinary Reviews: Computational Molecular Science*, 8(4):e1360.
- [Erba et al., 2014] Erba, A., Mahmoud, A., Belmonte, D., and Dovesi, R. (2014). High pressure elastic properties of minerals from ab initio simulations: The case of pyrope, grossular and andradite silicate garnets. *J. Chem. Phys.*, 140(12):124703.
- [Frisch et al., 2016] Frisch, M. J., Trucks, G. W., Schlegel, H. B., Scuseria, G. E., Robb, M. A., Cheeseman, J. R., Scalmani, G., Barone, V., Petersson, G. A., Nakatsuji, H., Li, X., Caricato, M., Marenich, A. V., Bloino, J., Janesko, B. G., Gomperts, R., Mennucci, B., Hratchian, H. P., Ortiz, J. V., Izmaylov, A. F., Sonnenberg, J. L., Williams-Young, D., Ding, F., Lipparini, F., Egidi, F., Goings, J., Peng, B., Petrone, A., Henderson, T., Ranasinghe, D., Zakrzewski, V. G., Gao,

- J., Rega, N., Zheng, G., Liang, W., Hada, M., Ehara, M., Toyota, K., Fukuda, R., Hasegawa, J., Ishida, M., Nakajima, T., Honda, Y., Kitao, O., Nakai, H., Vreven, T., Throssell, K., Montgomery, Jr., J. A., Peralta, J. E., Ogliaro, F., Bearpark, M. J., Heyd, J. J., Brothers, E. N., Kudin, K. N., Staroverov, V. N., Keith, T. A., Kobayashi, R., Normand, J., Raghavachari, K., Rendell, A. P., Burant, J. C., Iyengar, S. S., Tomasi, J., Cossi, M., Millam, J. M., Klene, M., Adamo, C., Cammi, R., Ochterski, J. W., Martin, R. L., Morokuma, K., Farkas, O., Foresman, J. B., and Fox, D. J. (2016). Gaussian 16 Revision C.01. Gaussian Inc. Wallingford CT.
- [Groom et al., 2016] Groom, C. R., Bruno, I. J., Lightfoot, M. P., and Ward, S. C. (2016). The Cambridge Structural Database. *Acta Crystallographica Section B*, 72(2):171–179.
- [Gu et al., 2013] Gu, X., Tian, S., Zhou, Q., Adkins, J., Gu, Z., Li, X., and Zheng, J. (2013). SERS detection of polycyclic aromatic hydrocarbons on a bowl-shaped silver cavity substrate. *RSC Adv.*, 3:25989–25996.
- [Hafner, 2008] Hafner, J. (2008). Ab-initio simulations of materials using VASP: Density-functional theory and beyond. *Journal of Computational Chemistry*, 29(13):2044–2078.
- [Jayaraj et al., 1996] Jayaraj, S. E., Ramakrishnan, V., Perumal, S., and Gurunathan, M. (1996). Surface enhanced raman scattering studies of acetophenone on colloidal silver particles. *Journal of Physics*, 47(3):255–259.
- [Kazantsev et al., 2011] Kazantsev, A. V., Karamertzanis, P. G., Adjiman, C. S., and Pantelides, C. C. (2011). Efficient Handling of Molecular Flexibility in Lattice Energy Minimization of Organic Crystals. *Journal of Chemical Theory and Computation*, 7(6):1998–2016.
- [M. J. Turner et al., 2017] M. J. Turner, J. J. McKinnon, S. K. Wolff, D. J. Grimwood, P. R. Spackman, D. Jayatilaka, and M. A. Spackman (2017). CrystalExplorer17 (2017).
- [Merrill and Bassett, 1974] Merrill, L. and Bassett, W. A. (1974). Miniature diamond anvil pressure cell for single crystal x-ray diffraction studies. *Review of Scientific Instruments*, 45(2):290–294.
- [Piermarini et al., 1975] Piermarini, G. J., Block, S., Barnett, J. D., and Forman, R. A. (1975). Calibration of the pressure dependence of the  $R_1$  ruby fluorescence line to 195 kbar. *Journal of Applied Physics*, 46(6):2774–2780.
- [Ragan et al., 1992] Ragan, D. D., Gustavsen, R., and Schiferl, D. (1992). Calibration of the ruby R1 and R2 fluorescence shifts as a function of temperature from 0 to 600 K. *Journal of Applied Physics*, 72(12):5539–5544.
- [Rajagopal et al., 2014] Rajagopal, S. K., Philip, A. M., Nagarajan, K., and Hariharan, M. (2014). Progressive acylation of pyrene engineers solid state packing

and colour via C–H···H–C, C–H···O and  $\pi$ – $\pi$  interactions. *Chemical Communications*, 50(63):8644–8647.

[Sajan et al., 2006] Sajan, D., Joe, I. H., and Jayakumar, V. S. (2006). Nir-ft raman, ft-ir and surface-enhanced raman scattering spectra of organic nonlinear optic material: p-hydroxy acetophenone. *Journal of Raman Spectroscopy*, 37(4):508–519.

[Sugden et al., 2016] Sugden, I., Adjiman, C. S., and Pantelides, C. C. (2016). Accurate and efficient representation of intramolecular energy in ab initio generation of crystal structures. I. Adaptive local approximate models. *Acta Crystallographica Section B: Structural Science, Crystal Engineering and Materials*, 72(6):864–874.

[Tchoń and Makal, 2021] Tchoń, D. and Makal, A. (2021). Software for rapid and reproducible pressure determination based on ruby chip fluorescence - pruby. (in preparation).

[Vinet et al., 1987] Vinet, P., Smith, J. R., Ferrante, J., and Rose, J. H. (1987). Temperature effects on the universal equation of state of solids. *Phys. Rev. B*, 35(4):1945–1953.

[Xie et al., 2010] Xie, Y., Wang, X., Han, X., Xue, X., Ji, W., Qi, Z., Liu, J., Zhao, B., and Ozaki, Y. (2010). Sensing of polycyclic aromatic hydrocarbons with cyclodextrin inclusion complexes on silver nanoparticles by surface-enhanced raman scattering. *Analyst*, 135:1389–1394.
